# Supplementary material for: Proteomics Identified UDP-Glycosyltransferase Family Members as Pro-Viral Factors for Turnip Mosaic Virus Infection in Nicotiana benthamiana
Source: MDPI journal article supplement (doi:10.3390/v15061401), 2023-06-20
Supplement: s1 [file s1]

# Proteomics Identified UDP-Glycosyltransferase Family Members as Pro-Viral Factors for Turnip Mosaic Virus Infection in *Nicotiana benthamiana*

**Table S1.** Primers used in this study.

| Primer Names         | Sequences (5' to 3')                       |
|----------------------|--------------------------------------------|
| Ptrv2-NbUGT73B5-LicF | gAggAgAagAgCCgTcgCACACAATAAAGATGTCAAGAC    |
| Ptrv2-NbUGT73B5-LicR | CgACgACAAGACCgTCACCCCTTGAATTGAGCCAATCTAAAC |
| qNbUGT73B5-F         | CTCGGCATGGTGTGAAGGCA                       |
| qNbUGT73B5-R         | TTGCAAGGGAACCTCGGTCGT                      |
| Ptrv2-UGT74F1-LicF   | gAggAgAagAgCCgTcgATGGACTTGTGAATAAC         |
| Ptrv2-UGT74F1-LicR   | CgACgACAAGACCgTCACCCCTTGATAAGGTCCTCTAGGG   |
| qNbUGT74F1-F         | CACCTCCGGTGAGGATTCCG                       |
| qNbUGT74F1-R         | GCGTCTACTACCTCAGCCTCCA                     |
| NbUGT74F1-licF       | CgACgACAAGACCgTCACCATGGACTTGTGAATAAC       |
| NbUGT74F1-licR       | gAggAgAagAgCCgTcgTTTAGTACATTTTGATAC        |
| Ptrv2-UGT91C1-Lic-F  | gAggAgAagAgCCgTcgATGGATACACAAGTAATAG       |
| Ptrv2-UGT91C1-Lic-R  | CgACgACAAGACCgTCACCTCTAAGGGCGTGATTGAGATG   |
| qNbUGT91C1-F         | TGCTAGGTTGATGGCAGAAC                       |
| qNbUGT91C1-R         | CGTCTCTTCAGCCCTTACAG                       |
| NbUGT91C1-Lic-F      | CgACgACAAGACCgTCACCATGGATACACAAGTAATAGAATG |
| NbUGT91C1-Lic-R      | gAggAgAagAgCCgTcgTTTACACTTATTACTAGTCTTAC   |
| Ptrv2NbUFGT3-lic-F   | gAggAgAagAgCCgTcgCTGCCTTCATTTGAGTCCCT      |
| Ptrv2NbUFGT3-lic-R   | CgACgACAAGACCgTCACCTTCGGCGAAGGTGTTGACCAT   |
| qNbUFGT3-F           | AGCTGGCCACCTCATCTCCA                       |
| qNbUFGT3-R           | ACGAACTGTAAGCGGGCTGT                       |
| qNbActin2-F          | GGGATGTGAAGGAGAAGTTGGC                     |
| qNbActin2-R          | ATCAGCAATGCCCGGGAACA                       |
| dsUGT74F1-F1         | ggcgcgccccatgcgggatcAGCTCTTCCTTATCCAAGCCA  |
| dsUGT74F1-R1         | catttgagaggacacgcggTGCGAGCCGATTTTCTTGAA    |
| dsUGT74F1-F2         | caatttgaggtatttgctAGCTCTTCCTTATCCAAGCCA    |
| dsUGT74F1-R2         | ggtcttaattaactctctagTGCGAGCCGATTTTCTTGAA   |
| dsUGT91C1-F1         | ggcgcgccccatgcgggatcACTGATGTTTCCATGGTTAGCA |
| dsUGT91C1-R1         | catttgagaggacacgcggGTGATTGAGATGGGGTGGGA    |
| dsUGT91C1-F2         | caatttgaggtatttgctACTGATGTTTCCATGGTTAGCA   |
| dsUGT91C1-R2         | ggtcttaattaactctctagGTGATTGAGATGGGGTGGGA   |

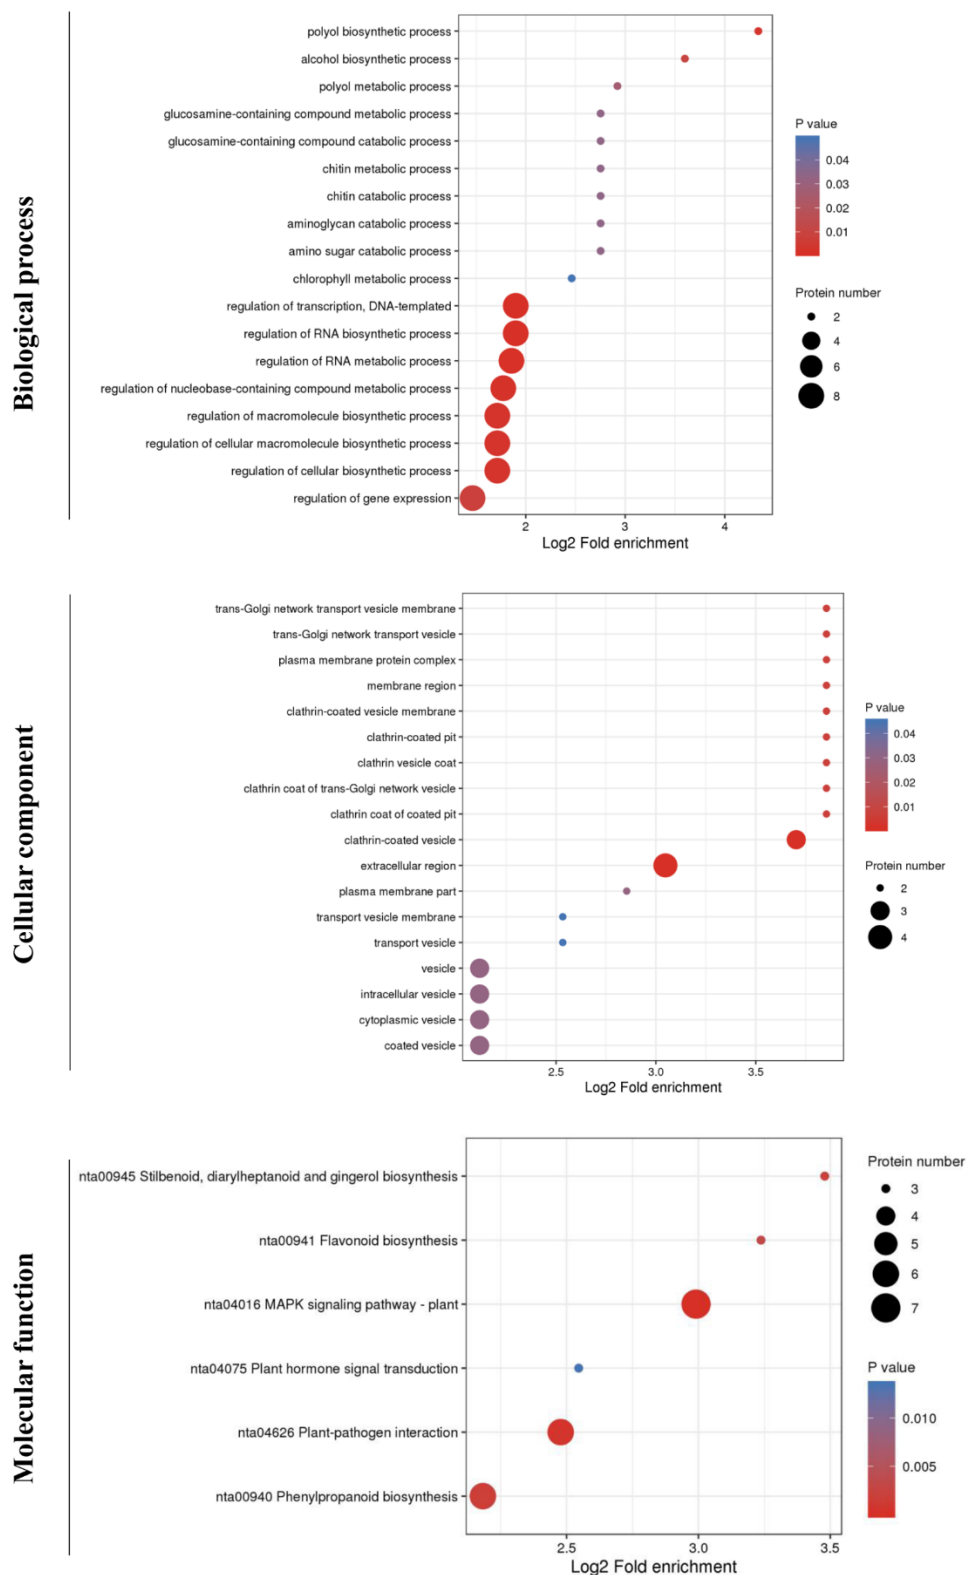

**Figure S1.** KOG functional classification of differentially accumulated proteins grouped into three major categories—biological process, cellular component and molecular function.

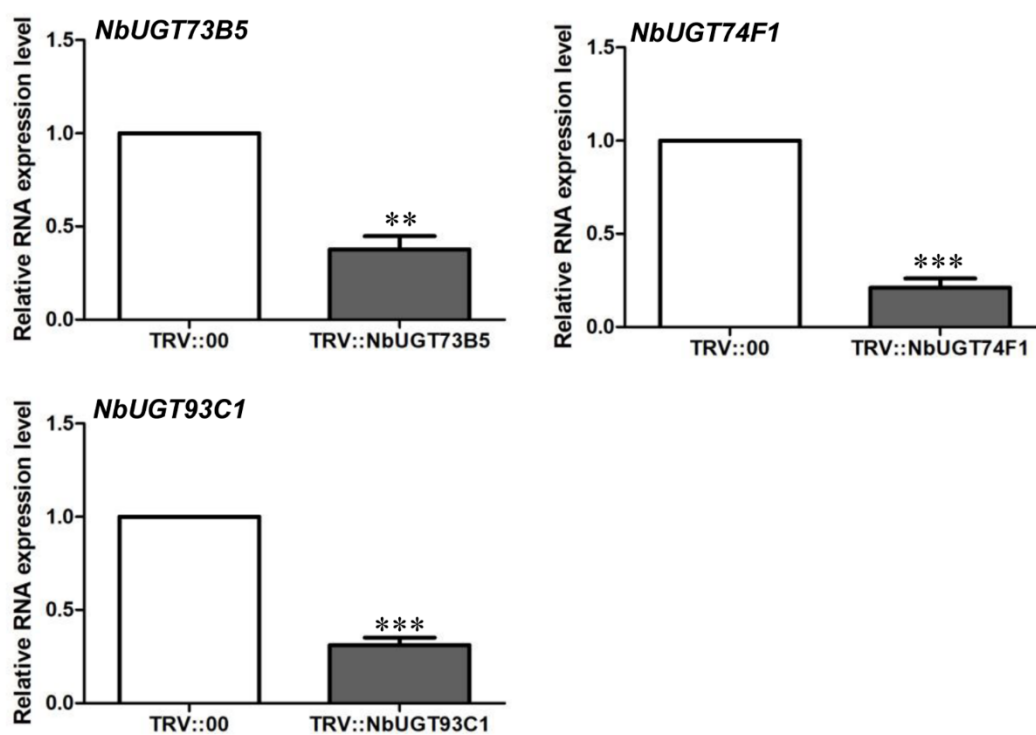

**Figure S2.** Validation of the TRV-based gene silencing efficiency by RT-qPCR. \*\* and \*\*\* represent statistically significant differences by the Student t-test between groups at  $p < 0.01$  and  $p < 0.001$ , respectively.

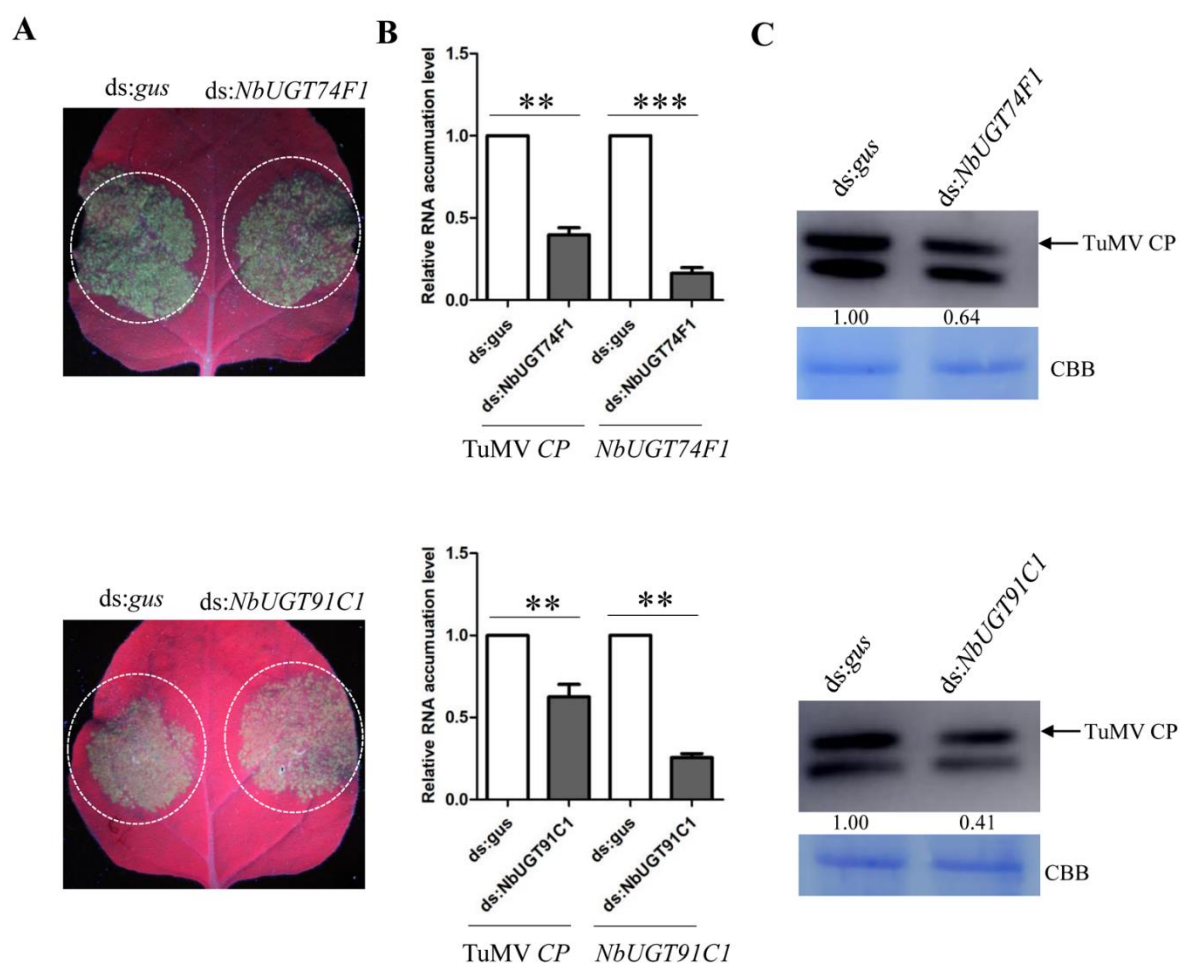

**Figure S3.** Effect of transient silencing of NbUGTs on TuMV infection. (A) GFP fluorescence in *N. benthamiana* plants inoculated with TuMV-GFP together with ds:GUS (control), ds:NbUGT74F1, or ds:NbUGT91C1. (B) RT-qPCR analysis of the gene silencing efficiency and TuMV RNA level at 3 dpai. (C) Western blotting results of TuMV CP accumulation in ds:GUS (control)-, ds:NbUGT74F1-, and ds:NbUGT91C1-treated regions at 3dpai. \*\* represent statistically significant differences by the Student *t*-test between groups at  $p < 0.01$ .
